# Supplementary material
Source: HighWire-hosted journal article supplement (https://erj.ersjournals.com/content/55/3/1902437)
Supplement: inline-supplementary-material-1 [file inline-supplementary-material-1.pdf]

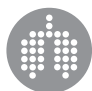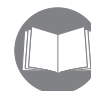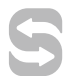

SHAREABLE PDF

# Maternal nutrition and child respiratory outcomes: paradigms of lung health and disease

Corrine Hanson<sup>1</sup> and Emily Brigham <sup>2</sup>

**Affiliations:** <sup>1</sup>Division of Medical Nutrition Education, College of Allied Health Professions, University of Nebraska Medical Center, Omaha, NE, USA. <sup>2</sup>Division of Pulmonary and Critical Care, Johns Hopkins University School of Medicine, Baltimore, MD, USA.

**Correspondence:** Corrine Hanson University of Nebraska Medical Center, Pulmonary Medicine, 985885 Nebraska Medical Center, Omaha, NE, USA. E-mail: ckhanson@unmc.edu

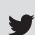

@ERSpublications

**A new study shows diet during pregnancy may influence lung health in future generations**  
<http://bit.ly/2FEOhLS>

**Cite this article as:** Hanson C, Brigham E. Maternal nutrition and child respiratory outcomes: paradigms of lung health and disease. *Eur Respir J* 2020; 55: 1902437 [https://doi.org/10.1183/13993003.02437-2019].

This single-page version can be shared freely online.

Given the large public health burden of obstructive lung diseases, such as asthma and COPD, considerable research has been conducted to identify targeted interventional strategies, with nutrition and dietary intake receiving increasing amounts of attention. Diets rich in antioxidants and omega-3 fatty acids, and low in saturated fats and processed foods (*i.e.* the Mediterranean diet) have been proposed as “respiratory healthy” diets, possibly attenuating the inflammatory response and potentially protecting against disease incidence, prevalence, and morbidity [1–5].
